# Supplementary material for: Calcium-activated Chloride Channel Regulator 1 (CLCA1) Controls Mucus Expansion in Colon by Proteolytic Activity
Source: PubMed Central journal article supplement — eBioMedicine. 2018 Jun 7;33:134–43. doi: 10.1016/j.ebiom.2018.05.031 (PMC6085540; doi:10.1016/j.ebiom.2018.05.031), 2018-06-07
Supplement: mmc3.pdf [file mmc3.pdf]

## **Supplemental Material to**

Calcium-activated chloride channel regulator 1 (CLCA1) controls mucus expansion in colon by proteolytic activity

Figure S1 and S2, page 2 and 3  
Video S1 as separate file.

### **Video S1: Videos of bead tracking in untreated and rCLCA1 treated *Clca1*<sup>-/-</sup> mucus**

A: Tracking of beads in the buffer 120  $\mu\text{m}$  above the mucus surface in untreated mucus at  $t = 60$  min.

B: Tracking of beads in the buffer 120  $\mu\text{m}$  above the mucus surface in rCLCA1 (10  $\mu\text{g}$ ) mucus at  $t = 60$  min (30 min of treatment).

Red/Purple spheres = tracked beads in untreated and rCLCA1 treated mucus respectively, cylinders = bead tracks colored by mean speed ( $\mu\text{m} / \text{second}$ ). The videos were recorded at 2.5 times the live speed.

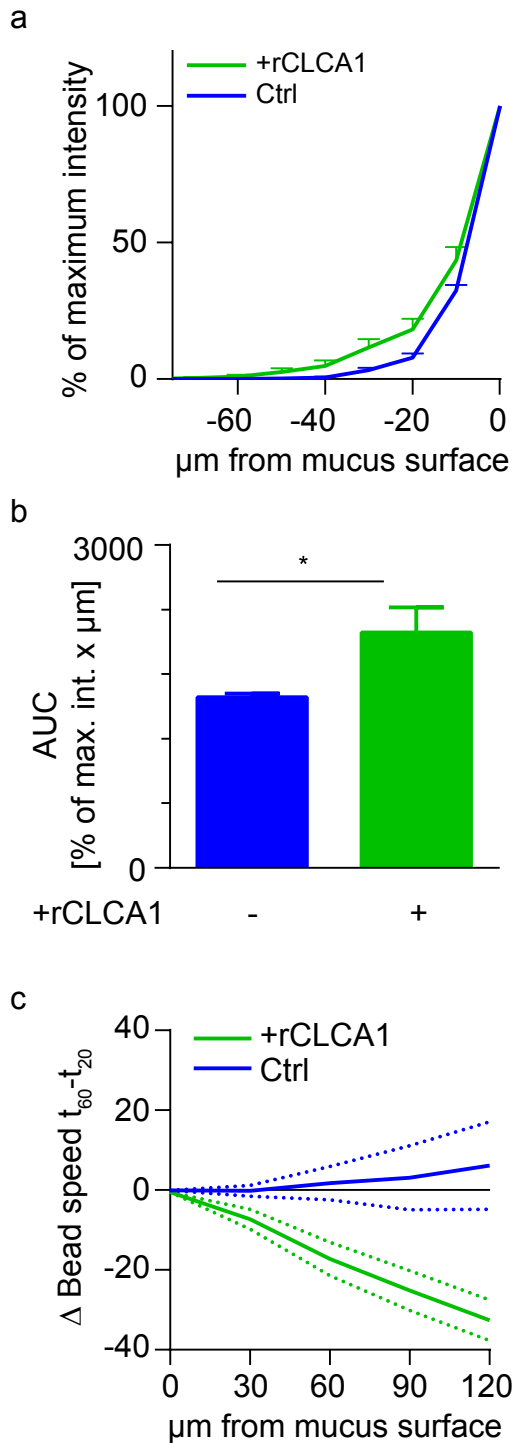

**Figure S1: Effect of rCLCA1 on WT mucus penetrability and bead tracking.**

(A) Distribution of beads in control or rCLCA1 (10µg) treated WT mucus. The z-position with highest bead intensity was defined as the mucus surface, and the bead penetrance in the mucus was plotted as % of maximum intensity at each z-position below the mucus surface. N=4 in each group. (B) Area under curve (AUC) analysis of bead penetrability data (A) comparing rCLCA1 treated with control mucus. C: Change in average bead speed in different z-planes above the mucus surface between  $t=20$  min and  $t=60$  min in control or rCLCA1 (10µg) treated WT mucus, where the treatments were applied at  $t=30$  min. Data are presented as mean  $\pm$  SEM (n=4 in each group). \*  $p \leq 0.05$ , \*\*  $p \leq 0.01$ , \*\*\*  $p \leq 0.001$  with either two-way ANOVA with Tukey's multiple correlation test (MCT) (B) or unpaired 2-tailed t-test (E).

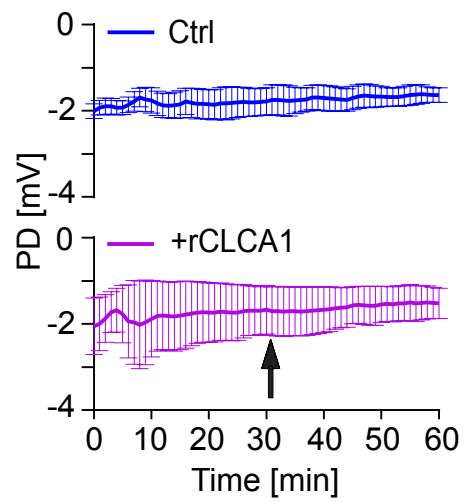

**Figure S2: potential difference in human colon biopsies with rCLCA1**

Transepithelial potential difference (PD) was recorded in untreated (Ctrl, blue) and rCLCA1(purple) treated human sigmoid colon biopsies. rCLCA1 was added at t= 32 min (arrow). Data is presented as mean  $\pm$  SEM (n= 4).
